# Supplementary material
Source: PubMed Central journal article supplement (PMC6129113)
Supplement: jiy297_suppl_supplementary_figure_2.pdf [file jiy297_suppl_supplementary_figure_2.pdf]

**Supplementary Figure 2** Neurokinin-1 receptor localization in primary human spinal astrocytes infected with VZV lysate without and with UV irradiation. Quiescent primary human spinal astrocytes (qHA-sps) were exposed to VZV lysates without and with UV irradiation and analyzed by immunofluorescence antibody assay (IFA) at 3 days post-infection using an antibody against neurokinin-1 receptor (NK-1R) and VZV glycoprotein B (gB). In qHA-sps exposed to VZV lysate, a VZV-infected cell (A, red) expressed NK-1R predominantly in the nucleus (A, green-yellow). In qHA-sps exposed to VZV lysate with UV irradiation to inactivate virus, no cells were infected with VZV and NK-1R was expressed predominantly in the cell membrane/cytoplasm (B, green). Mag 400X.

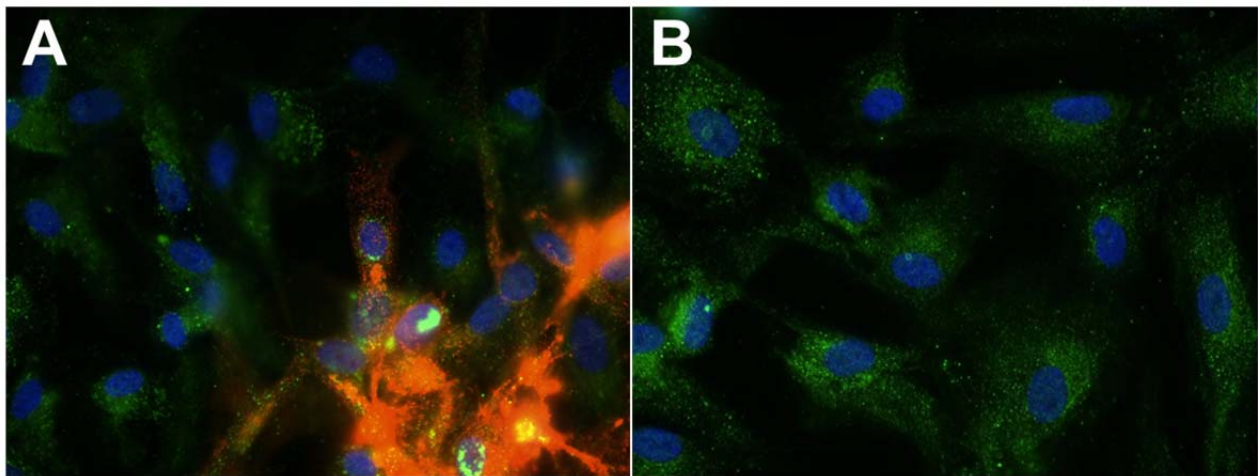

**VZV-lysate**

**UV inactivated VZV**
